# Supplementary material for: Response of tropical marine benthic diatoms exposed to elevatedirradiance and temperature
Source: Copernicus journal article supplement (doi:10.5194/bg-2021-18), 2021-02-22
Supplement: Supplementary file [file bg-2021-18-RC1-supplement.pdf]

**Review Report:**

Response of tropical marine benthic diatoms exposed to elevated irradiance and temperature

**General comment:**

The manuscript proposal and experimental design are good. This is an interesting study to evaluate the response of tropical benthic diatoms to high irradiance and temperature based on chl a and photosynthetic parameter analysis. Therefore, this manuscript is recommended for publication. However, there are minor correction need to be done. Please refer to the comments given below:

**Abstract**

Abstract was good, but what is the unit for recovery rates?

“The recovery rates for samples exposed to temperatures of 40°C were  $4.01E-03 \pm 0.002$  (kindly put the unit here, if any) and decreased to  $1.01E-05 \pm 0.001$  (kindly put the unit here, if any) at 60°C

**Introduction:**

Introduction is good

**Materials and methods**

Materials and methods are good

**Results**

Results are good

**Discussion**

Discussions are good

**Conclusions**

Conclusions are good.

**References**

References are good.

However if possible kindly update the citation/references and it should be the most current within 5 years

**Figure**

For Figure 2 (a, b, d), kindly put the x-axis title or you can put the x-axis title at the last graph (Fig.2d) only
